# Supplementary material for: Graphene Quantum Dots with High Yield and High Quality Synthesized from Low Cost Precursor of Aphanitic Graphite
Source: MDPI journal article supplement (doi:10.3390/nano10020375), 2020-02-21
Supplement: s1 [file s1]

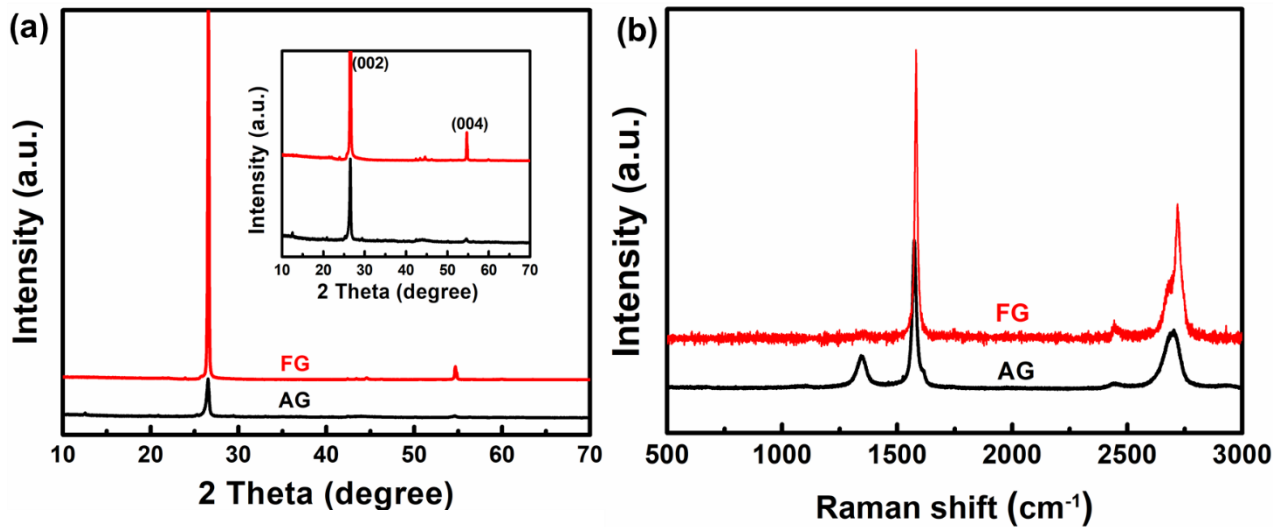

Figure S1. (a) XRD patterns and (b) Raman spectra of AG and FG.

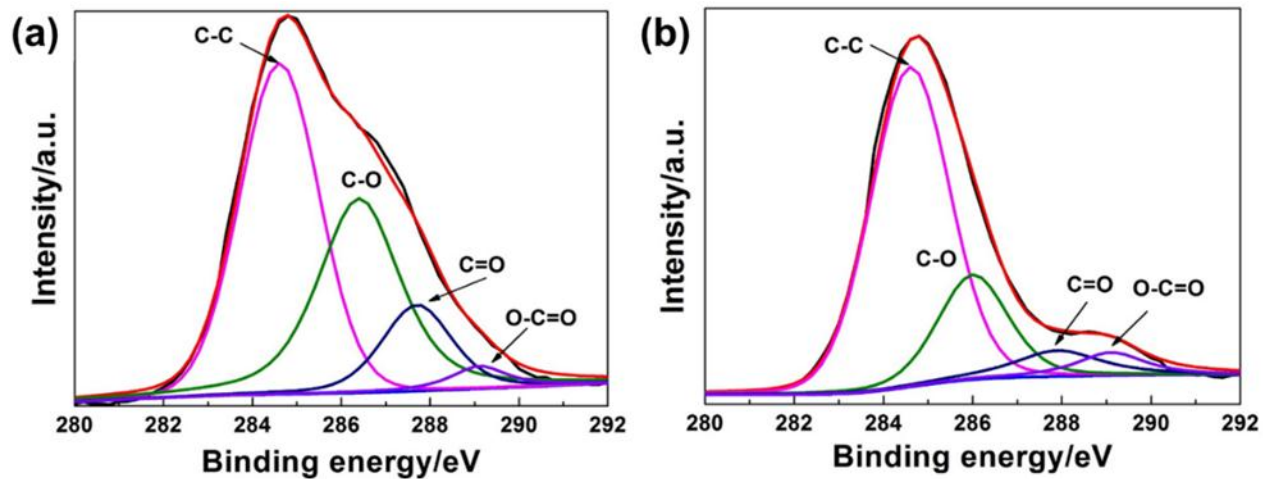

Figure S2. XPS patterns of GO-QDs (a) and GQDs (b).

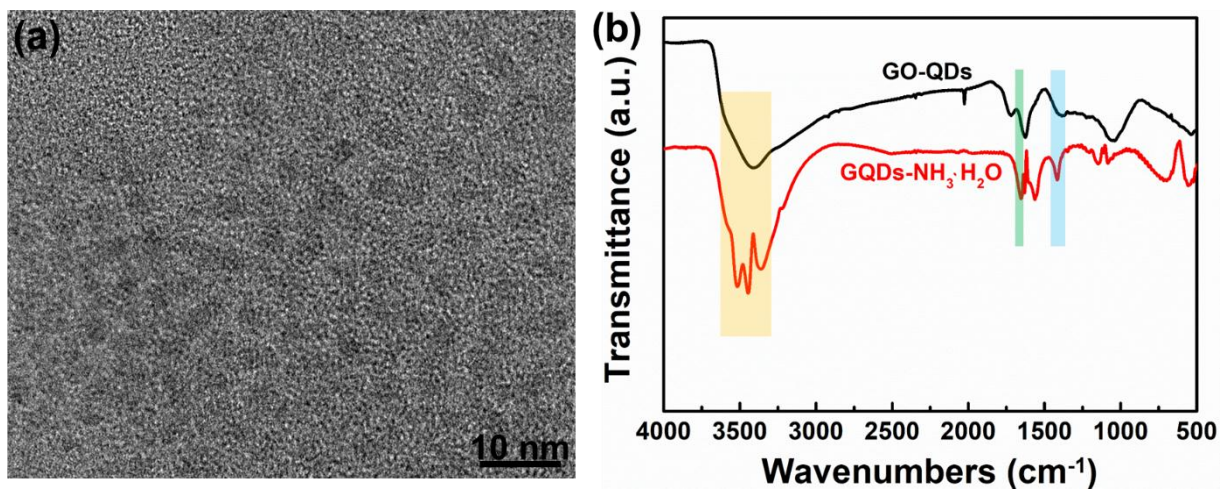

**Figure S3.** (a) TEM image of GQDs-NH<sub>3</sub>·H<sub>2</sub>O and (b) FTIR spectra of GQDs-NH<sub>3</sub>·H<sub>2</sub>O and GO-QDs.
